# Supplementary material for: Lacrimal Gland Repair after Short-term Obstruction of Excretory Duct in Rabbits
Source: PubMed Central journal article supplement (PMC5557958; doi:10.1038/s41598-017-08197-2), 2017-08-15

# **Lacrimal Gland Regeneration after Short-term Obstruction of Excretory Duct in Rabbits**

Hui Lin, MD, PhD,<sup>1</sup> Ying Liu, MD, PhD<sup>1</sup>, Hong He, MD, PhD,<sup>1</sup> Benjamin Botsford, MD,<sup>2</sup> Samuel Yiu\*, MD, PhD<sup>1</sup>

1. Wilmer Eye Institute, School of Medicine, Johns Hopkins University, Baltimore, MD, United States.
2. Tufts University School of Medicine, Boston, MA, United States.

\*Corresponding author: Samuel Yiu, MD, PhD

400 N. Broadway, Baltimore, Rm 6041, MD 21231, United States. Tel.: +1-443-287-4890.

[syiu2@jhmi.edu](mailto:syu2@jhmi.edu)

Supplementary Figure 1: Western Blot for K14. The lanes from left to right represent control, D0, D1, D3, D7, D10, D20 and D30 samples representatively.

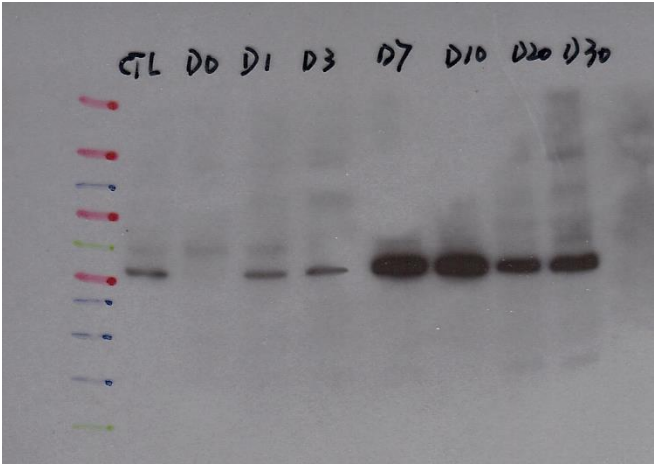

Supplementary Figure 2: Western Blot for T-tubulin. The lanes from left to right represent control, D0, D1, D3, D7, D10, D20 and D30 samples representatively.

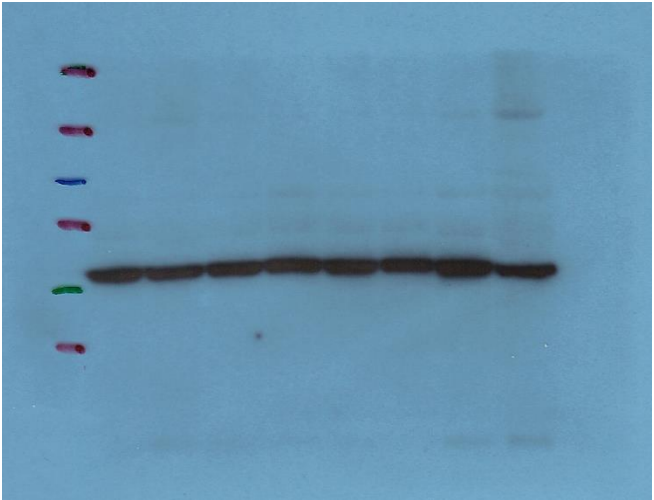

Supplement: 41598_2017_8197_MOESM1_ESM.pdf [file 41598_2017_8197_MOESM1_ESM.pdf]
